# Supplementary material
Source: PubMed Central journal article supplement (PMC3858588)
Supplement: NIHMS535462-supplement-1_si_001.pdf [file NIHMS535462-supplement-1_si_001.pdf]

Supporting Information

**Metabolic Flux Between Unsaturated and Saturated Fatty Acids is  
Controlled by the FabA:FabB Ratio in the Fully Reconstituted Fatty  
Acid Biosynthetic Pathway of *E. coli*<sup>#</sup>**

Xirui Xiao <sup>a</sup>, Xingye Yu <sup>b</sup> and Chaitan Khosla <sup>a,b\*</sup>

Departments of <sup>a</sup>Chemistry and <sup>b</sup>Chemical Engineering, Stanford University, Stanford  
CA 94305

\*To whom correspondence should be addressed. Contact information:

Prof. Chaitan Khosla

Address: Department of Chemistry, Stanford University, Stanford CA 94305

Telephone: 650-7236538

Fax number: 650-7250259

E-mail: [khosla@stanford.edu](mailto:khosla@stanford.edu)

**Table S1: Primers for PCR.**

| Gene        | Primers for PCR                                                                |
|-------------|--------------------------------------------------------------------------------|
| <i>accA</i> | Forward:<br>5' ATATCATATGAGTCTGAATTCCTTGA3'                                    |
|             | Reverse:<br>5' ATATGAATTCATGGGCTACTAGTTACGCGTAACCGTAGCTCA3'                    |
| <i>accC</i> | Forward:<br>5' ATATCATATGCTGGATAAAATTGTTAT 3'                                  |
|             | Reverse:<br>5' ATATGAATTCATGGGCTACTAGTTATTTTTCCTGAAGACCGA3'                    |
| <i>birA</i> | Forward:<br>5' ATATTCTAGAAATAATTTTGTTTA3'                                      |
|             | Reverse (for pXY33):<br>5' ATATACTAGTTATTTTCTGCACTACGCAGGGA3'                  |
|             | Reverse (for pXY44):<br>5' ATATAAGCTTATGGGCTACTAGTTATTTTCTGCACTACGCAGG<br>GA3' |

**Table S2: Plasmids used in this study.**

| <b>Plasmids</b>       | <b>Description</b>                                                                    | <b>Reference</b> |
|-----------------------|---------------------------------------------------------------------------------------|------------------|
| pCY216                | <i>P<sub>BAD</sub></i> : BirA<br>Origin of replication: p15a                          | 1                |
| pET21a-<br>BirA       | <i>P<sub>T7</sub></i> : C-terminally His-tagged BirA<br>Origin of replication: pBR322 | 2                |
| pJexpress411<br>-AccB | <i>P<sub>T7</sub></i> : N-terminally His-tagged AccB<br>Origin of replication: pUC    | This study       |
| pJexpress411<br>-AccD | <i>P<sub>T7</sub></i> : N-terminally His-tagged AccD<br>Origin of replication: pUC    | This study       |
| pXY30                 | <i>P<sub>T7</sub></i> : N-terminally His-tagged AccA<br>Origin of replication: pBR322 | This study       |
| pXY31                 | <i>P<sub>T7</sub></i> : N-terminally His-tagged AccB<br>Origin of replication: pBR322 | This study       |
| pXY42                 | <i>P<sub>T7</sub></i> : N-terminally His-tagged AccC<br>Origin of replication: pBR322 | This study       |

**References:**

- (1) Chapman-Smith, A., Turner, D. L., Cronan, J. E., Jr., Morris, T. W., and Wallace, J. C. (1994) Expression, biotinylation and purification of a biotin-domain peptide from the biotin carboxy carrier protein of *Escherichia coli* acetyl-CoA carboxylase. *Biochem. J.* 302 ( Pt 3), 881-887.
- (2) Howarth, M., Takao, K., Hayashi, Y., and Ting, A. Y. (2005) Targeting quantum dots to surface proteins in living cells with biotin ligase. *Proc. Natl. Acad. Sci. U. S. A.* 102, 7583-7588.
- (3) Davis, M. S., Solbiati, J., and Cronan, J. E., Jr. (2000) Overproduction of acetyl-CoA carboxylase activity increases the rate of fatty acid biosynthesis in *Escherichia coli*. *J. Biol. Chem.* 275, 28593-28598.

**Table S3: Calculated pI values of proteins <sup>a</sup>.**

| Protein          | pI  |
|------------------|-----|
| AccA             | 6.9 |
| <i>Holo-AccB</i> | 5.7 |
| AccC             | 7.5 |
| AccD             | 7.8 |
| FabA             | 7.7 |
| FabB             | 6.3 |
| FabD             | 6.0 |
| FabF             | 6.5 |
| FabG             | 7.7 |
| FabH             | 6.1 |
| FabI             | 6.8 |
| FabZ             | 8.1 |
| <i>Holo-ACP</i>  | 5.4 |
| TesA             | 7.4 |
| Wax synthase     | 9.0 |

<sup>a</sup> Values were calculated from:

<http://www.scripps.edu/~cdputnam/protcalc.html>
